# Supplementary material for: Knockdown of vimentin reduces mesenchymal phenotype of cholangiocytes in the Mdr2−/− mouse model of primary sclerosing cholangitis (PSC)
Source: PubMed Central journal article supplement — eBioMedicine. 2019 Sep 12;48:130–42. doi: 10.1016/j.ebiom.2019.09.013 (PMC6838376; doi:10.1016/j.ebiom.2019.09.013), 2019-09-12
Supplement: mmc1.pdf [file mmc1.pdf]

## SUPPLEMENTARY MATERIALS

**Supplementary Figure 1** Evaluation of epithelial and mesenchymal phenotypes in liver sections. **[a]** Immunofluorescence for S100a4 (in green) co-stained with CK-19 (in red). Nuclei are stained with DAPI. original magn. 40X, Scale bar = 20  $\mu\text{m}$ . **[b-c]** Immunofluorescence for vimentin or E-cadherin (in green) co-stained with desmin (in red). Nuclei are stained with DAPI. original magn. 40X, Scale bar = 20  $\mu\text{m}$ .

**Supplementary Figure 2** Evaluation of hepatic inflammation in liver sections. Immunohistochemistry for F4/80 in liver sections, original magn. 20X, Scale bar = 100  $\mu\text{m}$ . Percentage of F4/80-positive area. \* $p < 0.05$  versus WT mice; # $p < 0.05$  versus Mdr2<sup>-/-</sup> mice.

**Supplementary Figure 3** Evaluation of angiogenesis in liver sections. Immunohistochemistry for VEGFA in liver sections, original magn. 20X, Scale bar = 100  $\mu\text{m}$ . Percentage of VEGFA-positive area. \* $p < 0.05$  versus WT mice; # $p < 0.05$  versus Mdr2<sup>-/-</sup> mice.

**Supplementary Figure 4** Evaluation of E-cadherin expression in human PSC patients. Immunofluorescence for E-cadherin (in green) co-stained with CK-19 (in red). Nuclei are stained with DAPI. original magn. 20X, Scale bar = 10  $\mu\text{m}$ .

# Supplementary Figure 1

**a**

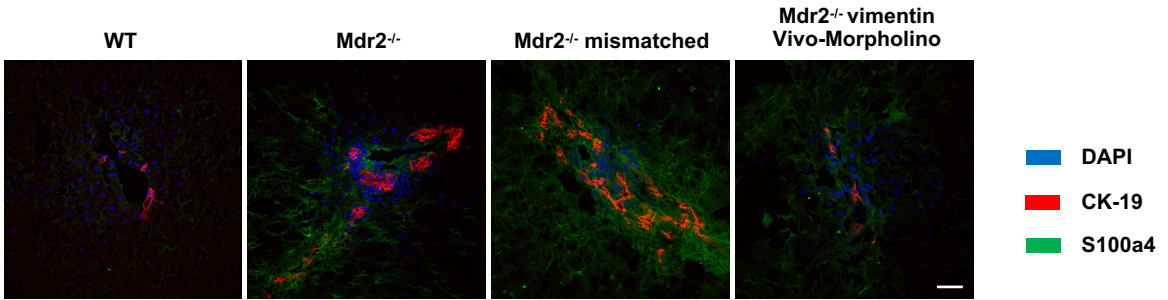

**b**

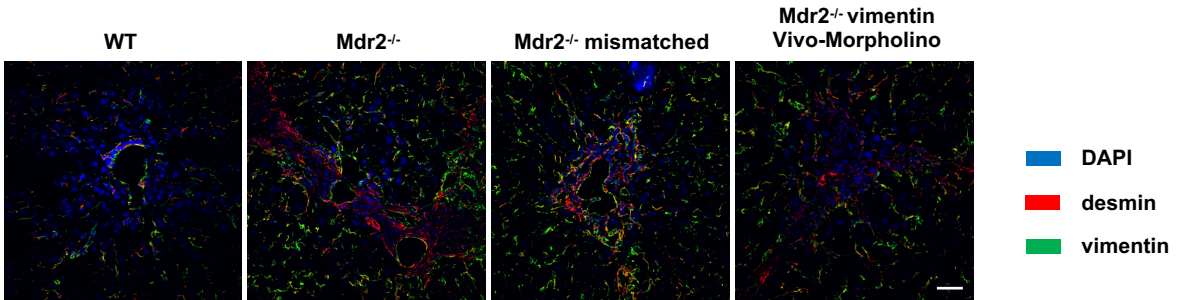

**c**

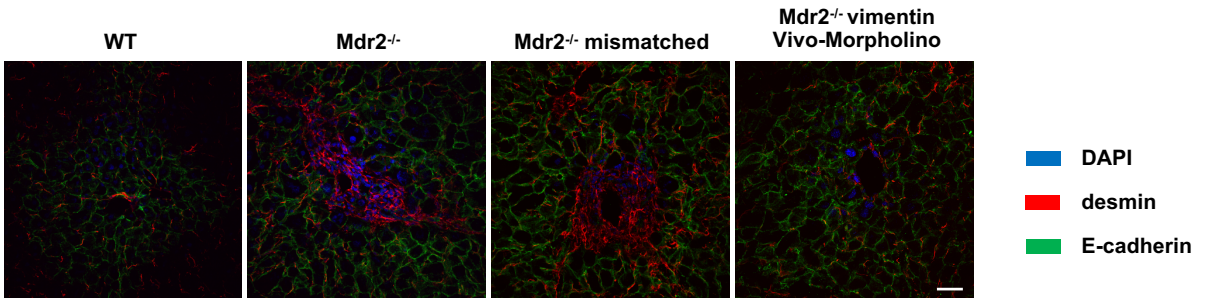

## Supplementary Figure 2

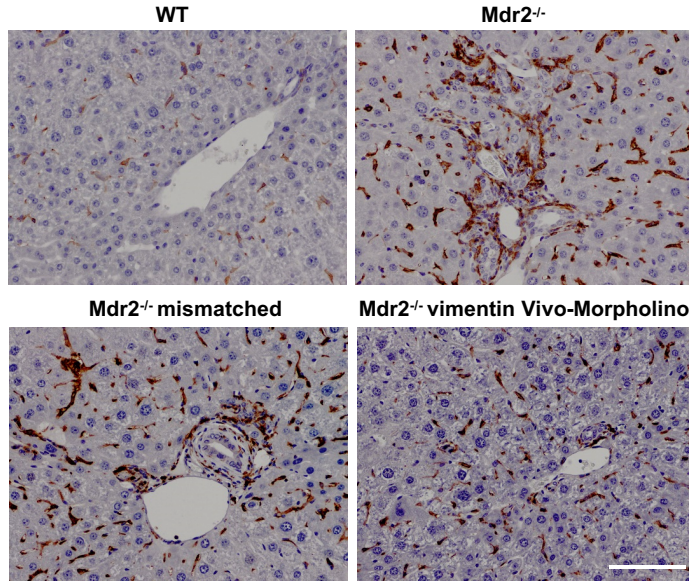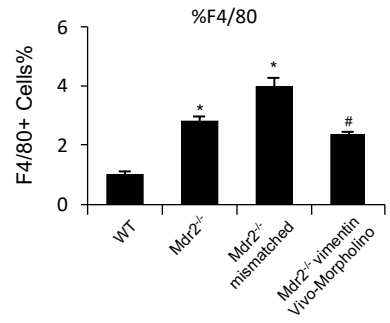

### Supplementary Figure 3

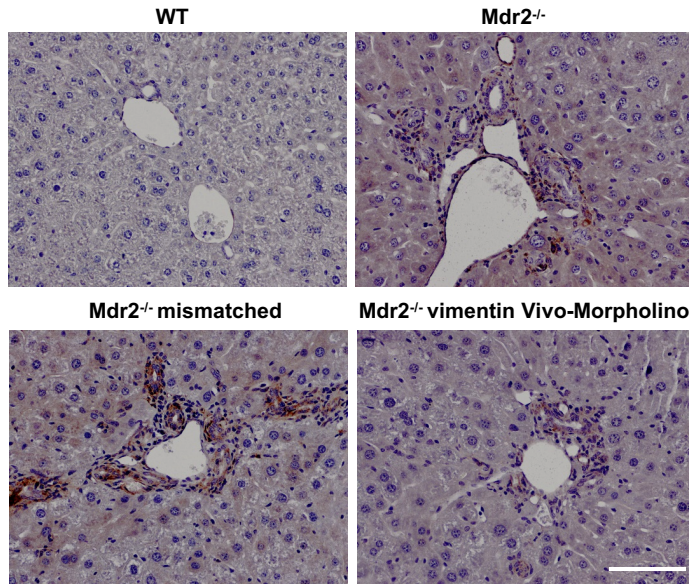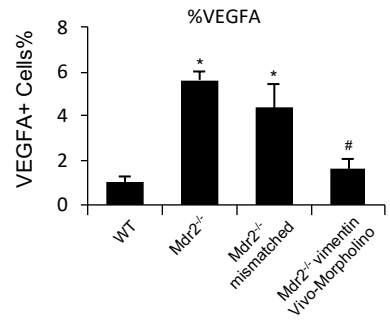

## Supplementary Figure 4

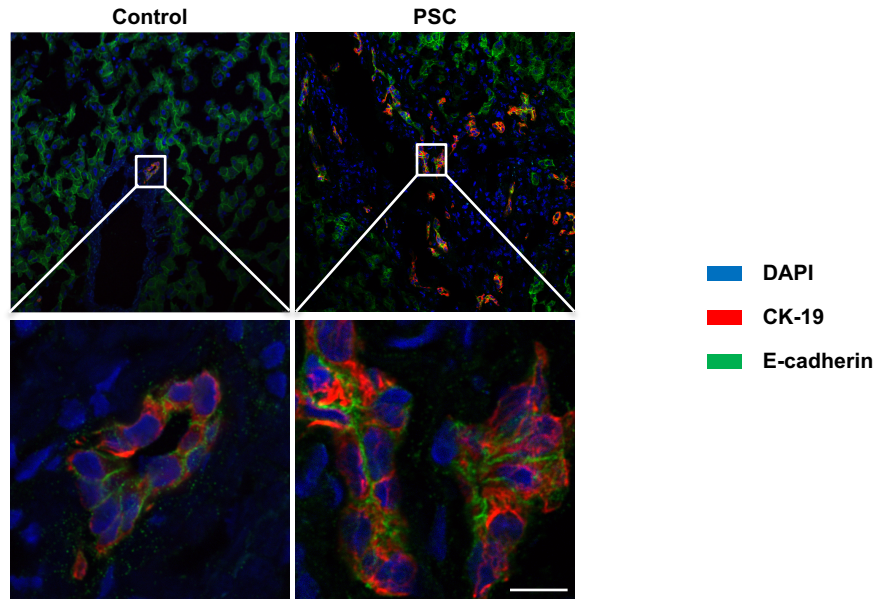

**Supplemental Table 1. List of qPCR primers**

| <b>Gene</b>     | <b>Species</b> | <b>Detected transcript</b> | <b>Source</b> |
|-----------------|----------------|----------------------------|---------------|
| $\alpha$ -SMA   | Mouse          | NM_007392                  | QIAGEN        |
| Col1a1          | Mouse          | NM_007742                  | QIAGEN        |
| E-cadherin      | Mouse          | NM_009864                  | QIAGEN        |
| Fn1             | Mouse          | NM_010233                  | QIAGEN        |
| GAPDH           | Mouse          | NM_008084                  | QIAGEN        |
| N-cadherin      | Mouse          | NM_007664                  | QIAGEN        |
| p16             | Mouse          | NM_009877                  | QIAGEN        |
| p21             | Mouse          | NM_007669                  | QIAGEN        |
| S100a4          | Mouse          | NM_011311                  | QIAGEN        |
| TGF- $\beta$ 1  | Mouse          | NM_011577                  | QIAGEN        |
| $\alpha$ -SMA   | Human          | NM_001141945               | QIAGEN        |
| Col1 $\alpha$ 1 | Human          | NM_000088                  | QIAGEN        |
| E-cadherin      | Human          | NM_004360                  | QIAGEN        |
| Fn-1            | Human          | NM_002026                  | QIAGEN        |
| GAPDH           | Human          | NM_001256799               | QIAGEN        |
| N-cadherin      | Human          | NM_001042572               | QIAGEN        |
| p16             | Human          | NM_000077                  | QIAGEN        |
| p21             | Human          | NM_000389                  | QIAGEN        |
| S100a4          | Human          | NM_002961                  | QIAGEN        |
| TGF- $\beta$ 1  | Human          | NM_000660                  | QIAGEN        |
| vimentin        | Human          | NM_003380                  | QIAGEN        |

**Supplemental Table 2: Characteristics of human control and PSC samples.**

| <b>Group</b> | <b>No.</b> | <b>Diagnosis</b> | <b>Age</b> | <b>Gender</b> | <b>Ethnicity</b> | <b>Cirrhosis</b> | <b>Sample Type</b>  |
|--------------|------------|------------------|------------|---------------|------------------|------------------|---------------------|
| Control      | S1         | Normal           | N/A        | N/A           | N/A              | No               | Total liver         |
| Control      | S2         | Normal           | N/A        | N/A           | N/A              | No               | Total liver         |
| Control      | S3         | Normal           | N/A        | N/A           | N/A              | No               | Total liver         |
| Control      | S4         | Normal           | N/A        | N/A           | N/A              | No               | Total liver         |
| Control      | S5         | Normal           | N/A        | N/A           | N/A              | No               | Total liver         |
| Control      | S6         | Normal           | N/A        | N/A           | N/A              | No               | FFPE liver sections |
| PSC          | S1         | Late stage PSC   | 60         | Male          | Caucasian        | N/A              | Total liver         |
| PSC          | S2         | Early stage PSC  | N/A        | N/A           | Caucasian        | N/A              | Total liver         |
| PSC          | S3         | Early stage PSC  | 57         | Male          | Caucasian        | N/A              | Total liver         |
| PSC          | S4         | Early stage PSC  | 33         | Male          | Caucasian        | N/A              | Total liver         |
| PSC          | S5         | Early stage PSC  | 47         | Female        | Caucasian        | N/A              | Total liver         |

|     |    |                 |     |      |           |     |                     |
|-----|----|-----------------|-----|------|-----------|-----|---------------------|
| PSC | S6 | Early stage PSC | 42  | Male | Caucasian | N/A | Total liver         |
| PSC | S7 | Early stage PSC | 63  | Male | Caucasian | N/A | Total liver         |
| PSC | S8 | Stage I PSC     | N/A | N/A  | N/A       | N/A | FFPE liver sections |
| PSC | S9 | Stage IV PSC    | N/A | N/A  | N/A       | N/A | FFPE liver sections |

FFPE = formalin fixed paraffin embedded; N/A = Not available; PSC = Primary Sclerosing Cholangitis. Table outlining the characteristics of human control and PSC samples.
